# Supplementary material
Source: PubMed Central journal article supplement (PMC4838554)

**A**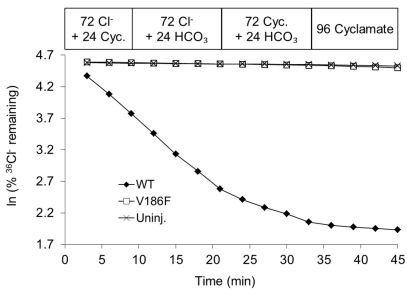**B**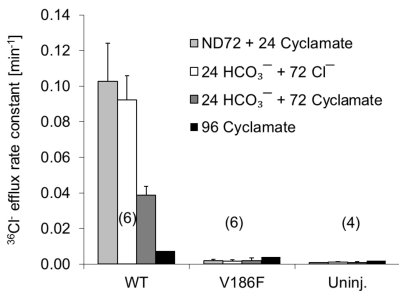**C**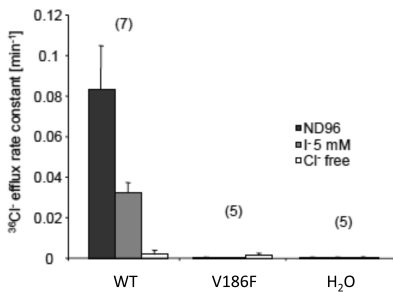

**A**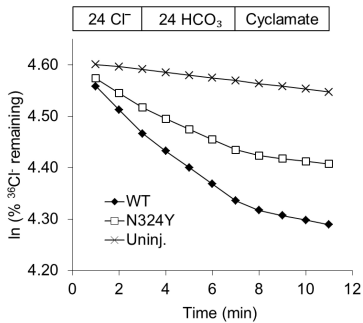**B**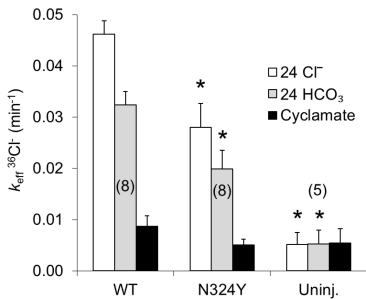**C**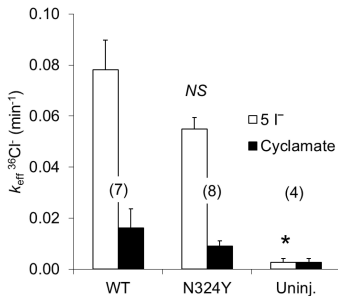

Supplement: NIHMS726497-supplement-Supp_FigureS1-S2.pdf [file NIHMS726497-supplement-Supp_FigureS1-S2.pdf]
